# Supplementary material
Source: MDPI journal article supplement (https://www.mdpi.com/2311-5637/8/11/591)
Supplement: s1 [file s1]

## Supplementary material

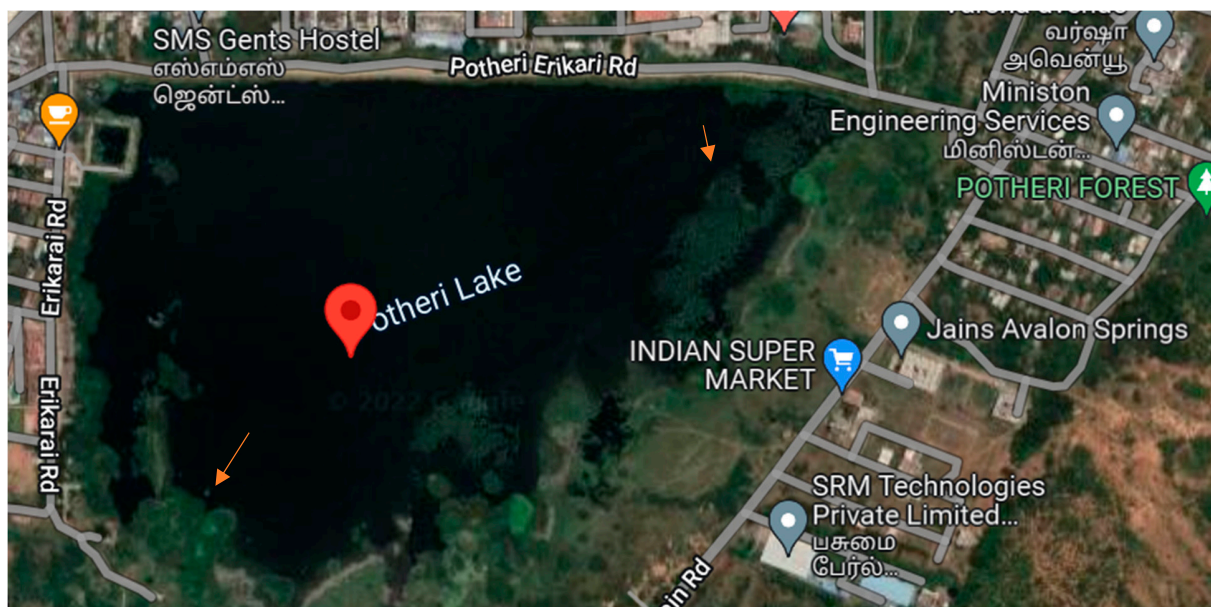

Figure S1 GPS image of the source of WH collected (Potheri: 12°49'03.6"N 80°02'45.3"E). The arrows indicate the infestation of the aquatic weed

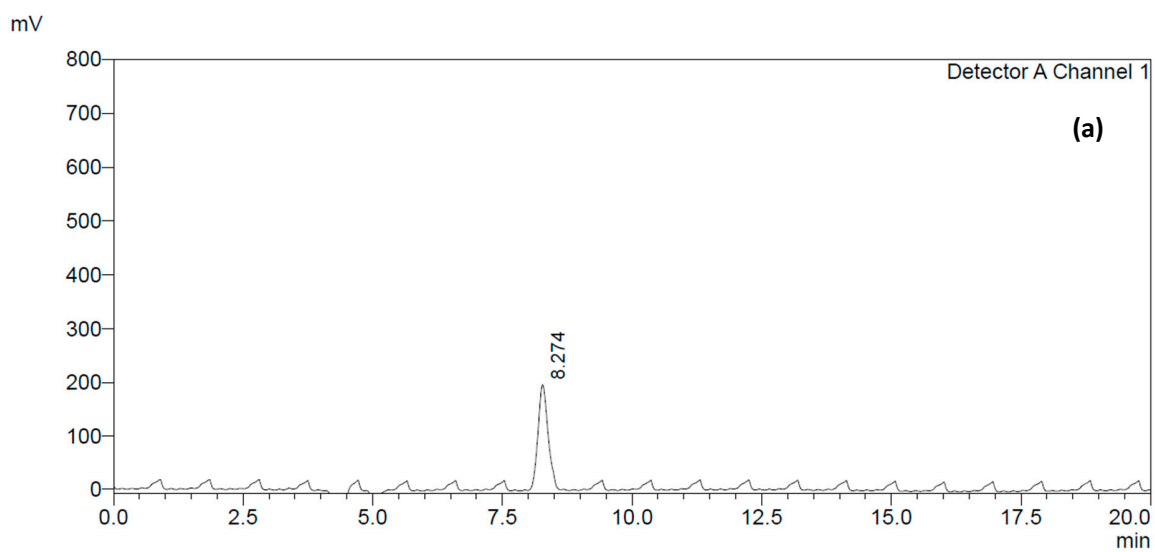

Detector A Channel 1

Peak Table

| Peak# | Ret. Time | Area    | Height | Area%   |
|-------|-----------|---------|--------|---------|
| 1     | 8.274     | 2682341 | 196699 | 100.000 |
| Total |           | 2682341 | 196699 | 100.000 |

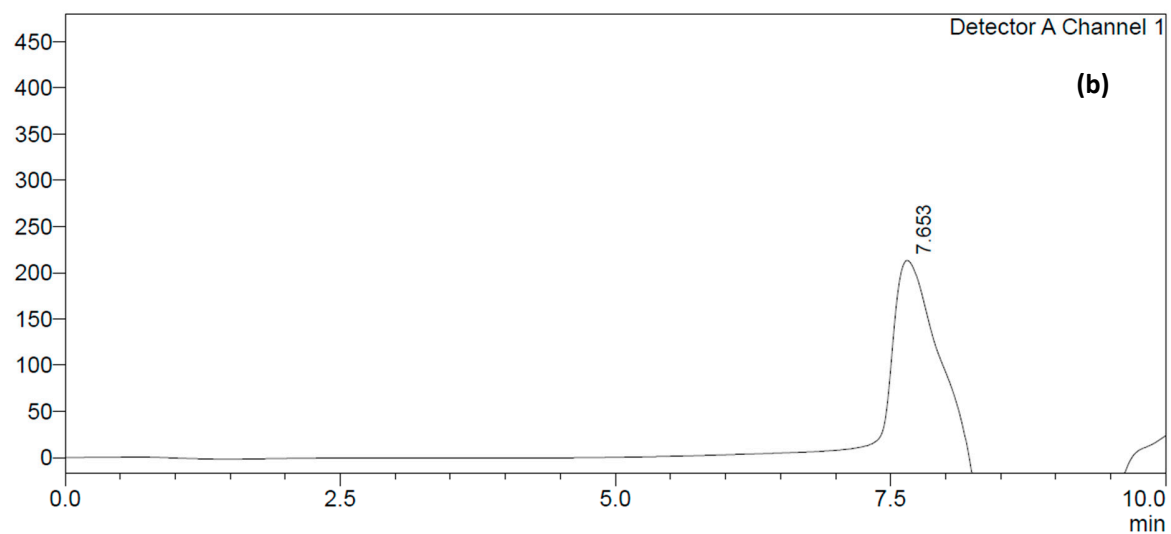

Peak Table

| Detector A Channel 1 |           |         |        |         |
|----------------------|-----------|---------|--------|---------|
| Peak#                | Ret. Time | Area    | Height | Area%   |
| 1                    | 7.653     | 5379049 | 201720 | 100.000 |
| Total                |           | 5379049 | 201720 | 100.000 |

Figure S2 HPLC Chromatogram (a) Standard xylitol (b) Xylitol peak for *Rhodospiridium toruloides* NCIM 3547

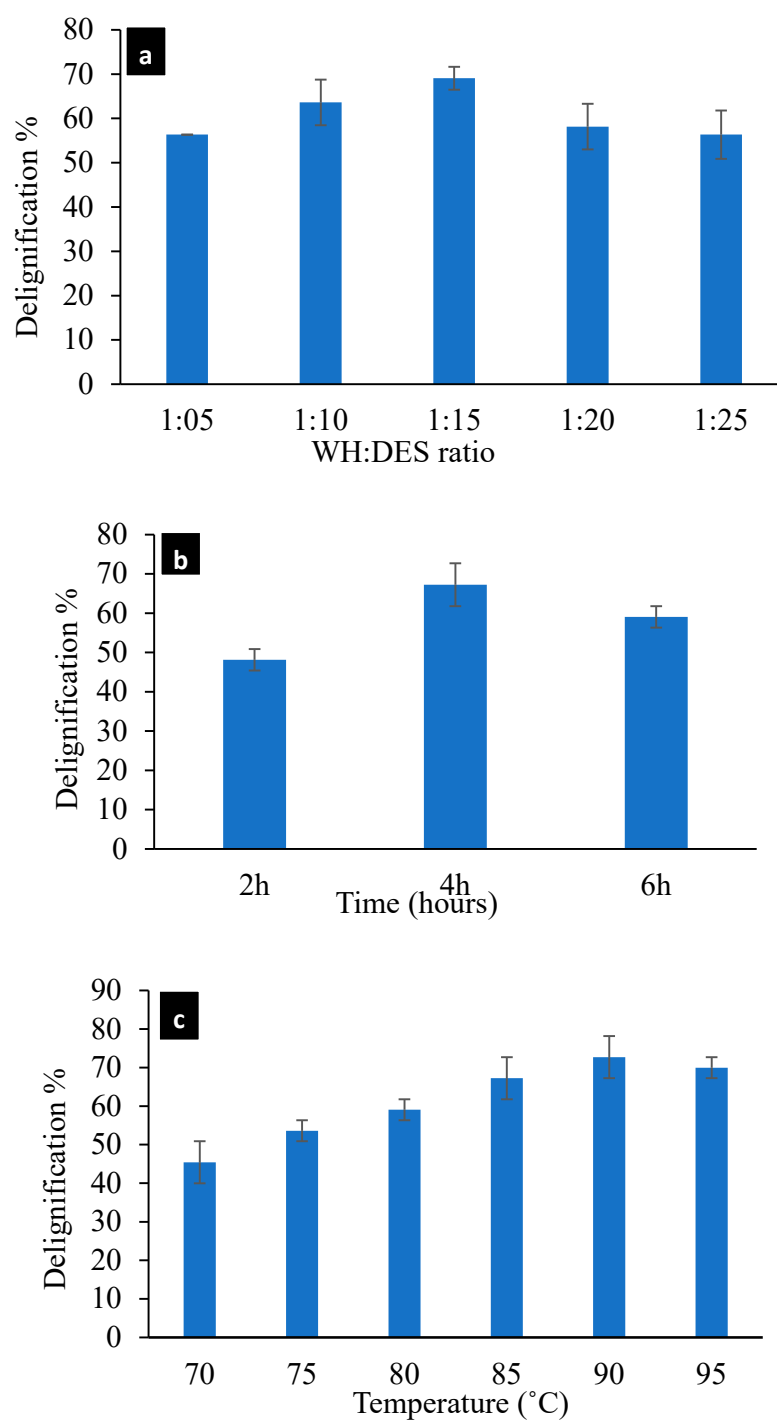

Figure S3. Effect of (a) WH:DES ratio, (b) Time and (c) Temperature on percentage delignification (All the treatments were done in triplicates and the values represent mean  $\pm$  standard deviation)

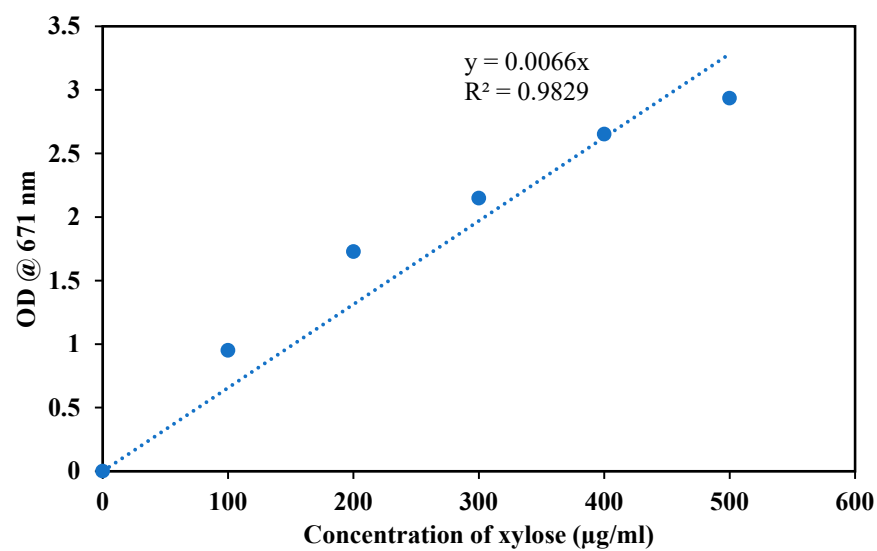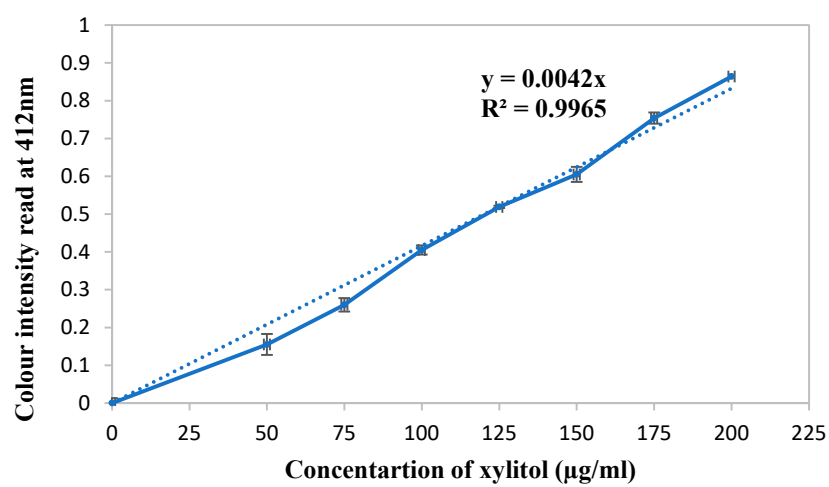

Figure. S4 Standard plot for (a) Xylose (b) Xylitol

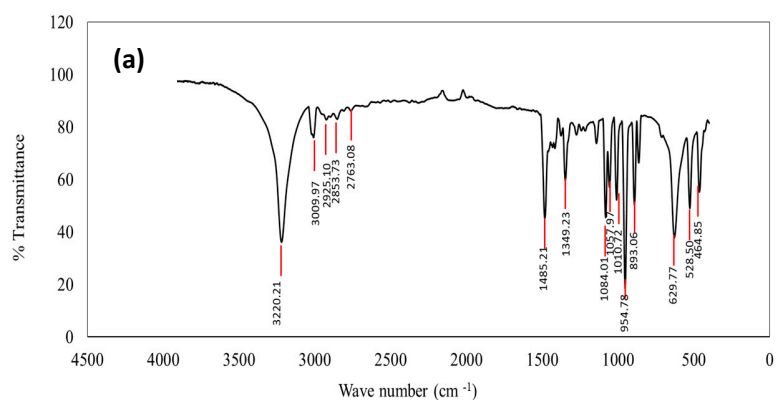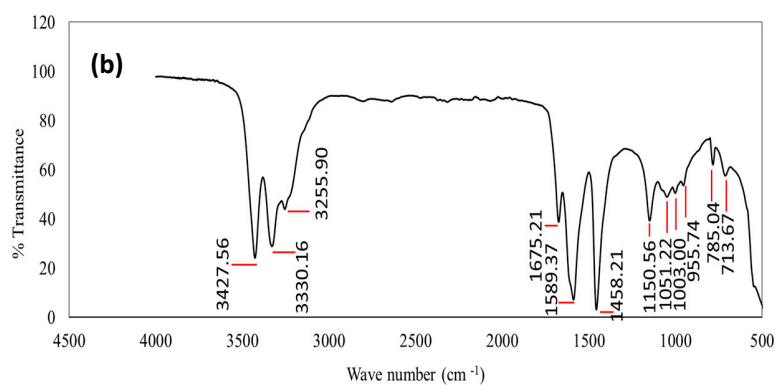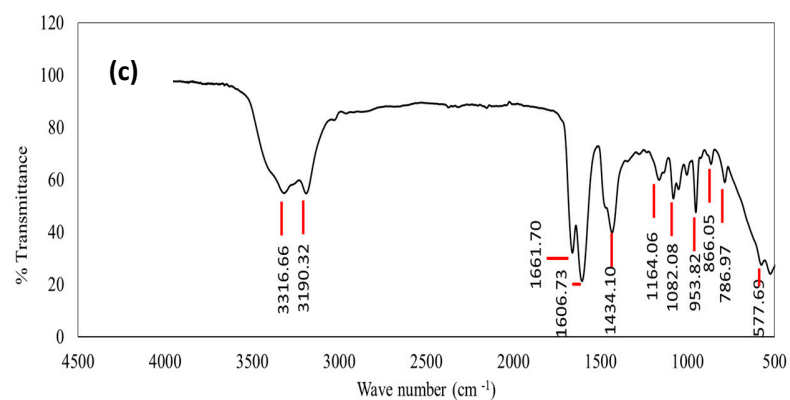

Figure S5. FTIR spectra of (a) Choline chloride (b) Urea  
(c) Choline chloride:Urea

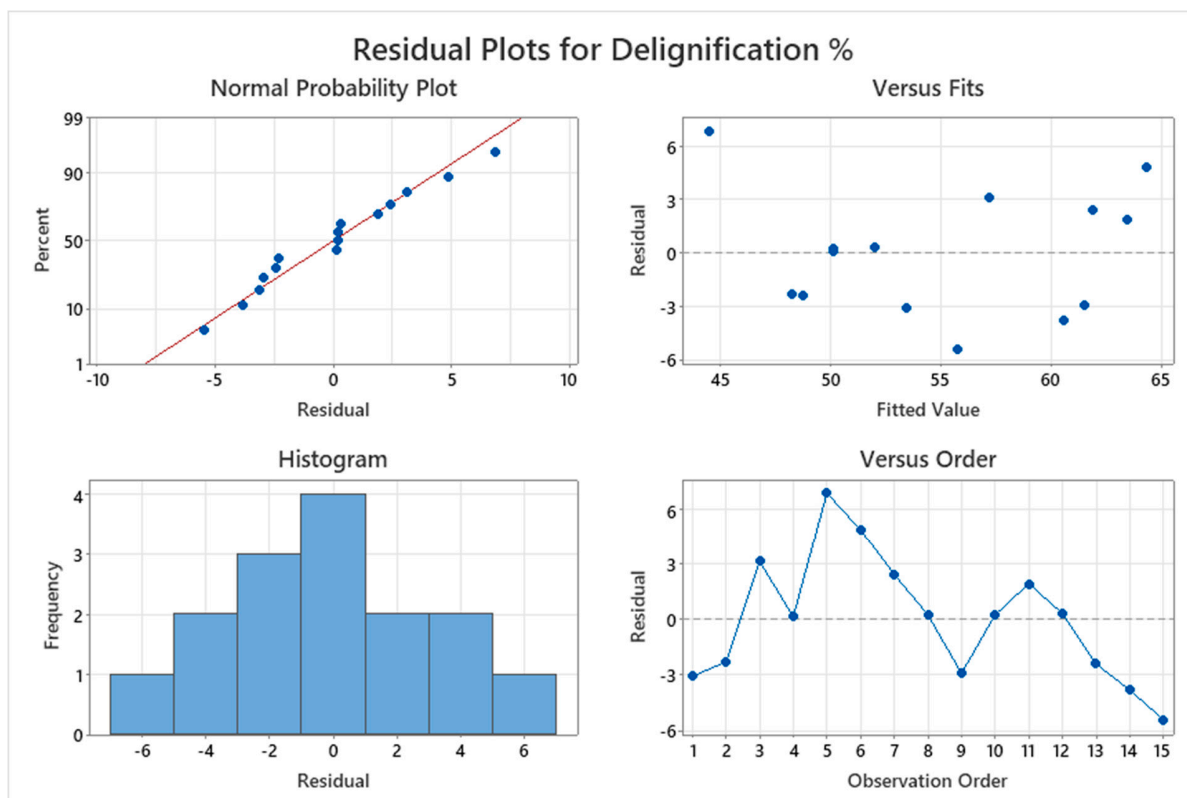

Figure S6. Residual plots for the optimization of WH pretreatment using DES through BBD-RSM

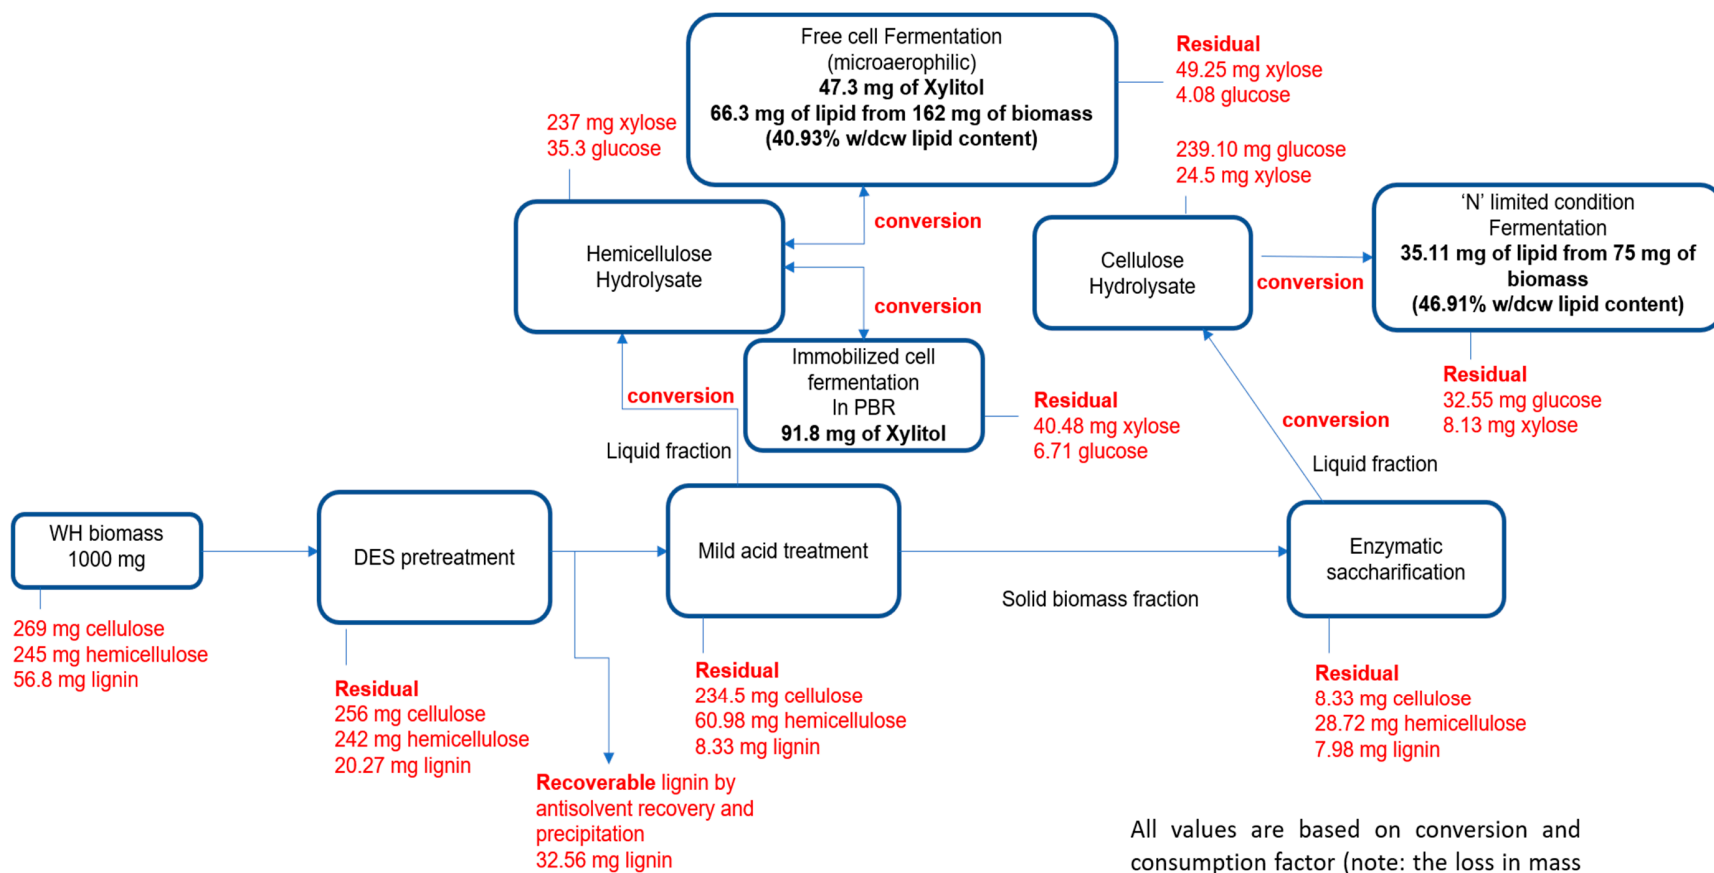

All values are based on conversion and consumption factor (note: the loss in mass flow has not represented)

Figure S7. Mass flow of WH during pretreatment, saccharification (cellulose and hemicellulose) and fermentation for co-production of xylitol and lipid
